# Supplementary material for: Patellar Tendinopathy—Does Injection Therapy Have a Role? A Systematic Review of Randomised Control Trials
Source: MDPI journal article supplement (doi:10.3390/jcm11072006), 2022-04-03
Supplement: s1 [file s1]

**Supplementary Table S1.** PICOS criteria used to define the research question

| <b>Acronym</b> | <b>Definiton</b> | <b>Description</b>                                                                                             |
|----------------|------------------|----------------------------------------------------------------------------------------------------------------|
| <b>P</b>       | Participants     | Individuals diagnosed with patellar tendinopathy                                                               |
| <b>I</b>       | Intervention     | Administration of injections                                                                                   |
| <b>C</b>       | Comparison       | The comparison can occur through a placebo group or a group that has received a treatment other than injection |
| <b>O</b>       | Outcomes         | Either patient-reported outcomes or biological and clinical markers of the tendon healing                      |
| <b>S</b>       | Study design     | Randomized Clinical Trials                                                                                     |
