# Supplementary material for: Patellar Tendinopathy—Does Injection Therapy Have a Role? A Systematic Review of Randomised Control Trials
Source: MDPI journal article supplement (doi:10.3390/jcm11072006), 2022-04-03
Supplement: s1 [file s1]

**Supplementary Table S2:** Database formulas during the literature search

---

**PubMed Search Formula**

(Patella) OR (patellar)) OR (patellar tendon)) AND (Tendinopathy)) OR (tendinitis)) OR (tendinosis)) OR (patellar tendinopathy)) OR (jumpers knee)) ) AND (Injection)) OR (platelet-rich plasma)) OR (platelet rich plasma)) OR (corticosteroid)) OR (autologous blood)) OR (sclerosing)) OR (dry needling)) OR (hyaluronic acid)) OR (aprotinin)) OR (high volume injection)) OR (prolotherapy)

**WOS Search Formula**

(ALL=(Patella ) OR ALL=( patellar) OR ALL=(patellar tendon) AND ALL=(Tendinopathy) OR ALL=( tendinitis ) OR ALL=(tendinosis)) OR ALL=(patellar tendinopathy)) OR ALL=(jumpers knee)) OR ALL=(Injection)) OR ALL=(platelet-rich plasma)) OR ALL=(platelet rich plasma)) OR ALL=(corticosteroid)) OR ALL=(autologous blood)) OR ALL=(sclerosing)) OR ALL=(dry needling)) OR ALL=(hyaluronic acid)) OR ALL=(aprotinin)) OR ALL=(high volume injection)) OR ALL=(prolotherapy)

**SCOPUS Search Formula**

( TITLE-ABS-KEY ( patella ) OR TITLE-ABS-KEY ( patellar ) OR TITLE-ABS-KEY ( patellar AND tendon ) AND TITLE-ABS-KEY ( tendinopathy ) OR TITLE-ABS-KEY ( tendinitis ) OR TITLE-ABS-KEY ( tendinosis ) OR TITLE-ABS-KEY ( patellar AND tendinopathy ) OR TITLE-ABS-KEY ( jumpers AND knee ) AND TITLE-ABS-KEY ( injection ) OR TITLE-ABS-KEY ( platelet-rich AND plasma ) OR TITLE-ABS-KEY ( platelet AND rich AND plasma ) OR TITLE-ABS-KEY ( corticosteroid ) OR TITLE-ABS-KEY ( autologous AND blood ) OR TITLE-ABS-KEY ( sclerosing ) OR TITLE-ABS-KEY ( dry AND needling ) OR TITLE-ABS-KEY ( hyaluronic AND acid ) OR TITLE-ABS-KEY ( aprotinin ) OR TITLE-ABS-KEY ( high AND volume AND injection ) OR TITLE-ABS-KEY ( prolotherapy ) ) )
